# Supplementary material
Source: Springer Nature journal article supplement (https://www.springermedizin.de/resource/supplementary/12889_2007_1148_MOESM2_ESM.pdf/9502574)

Proportion of reviews fulfilling criterion

0% 20% 40% 60% 80% 100%

Quality criterion

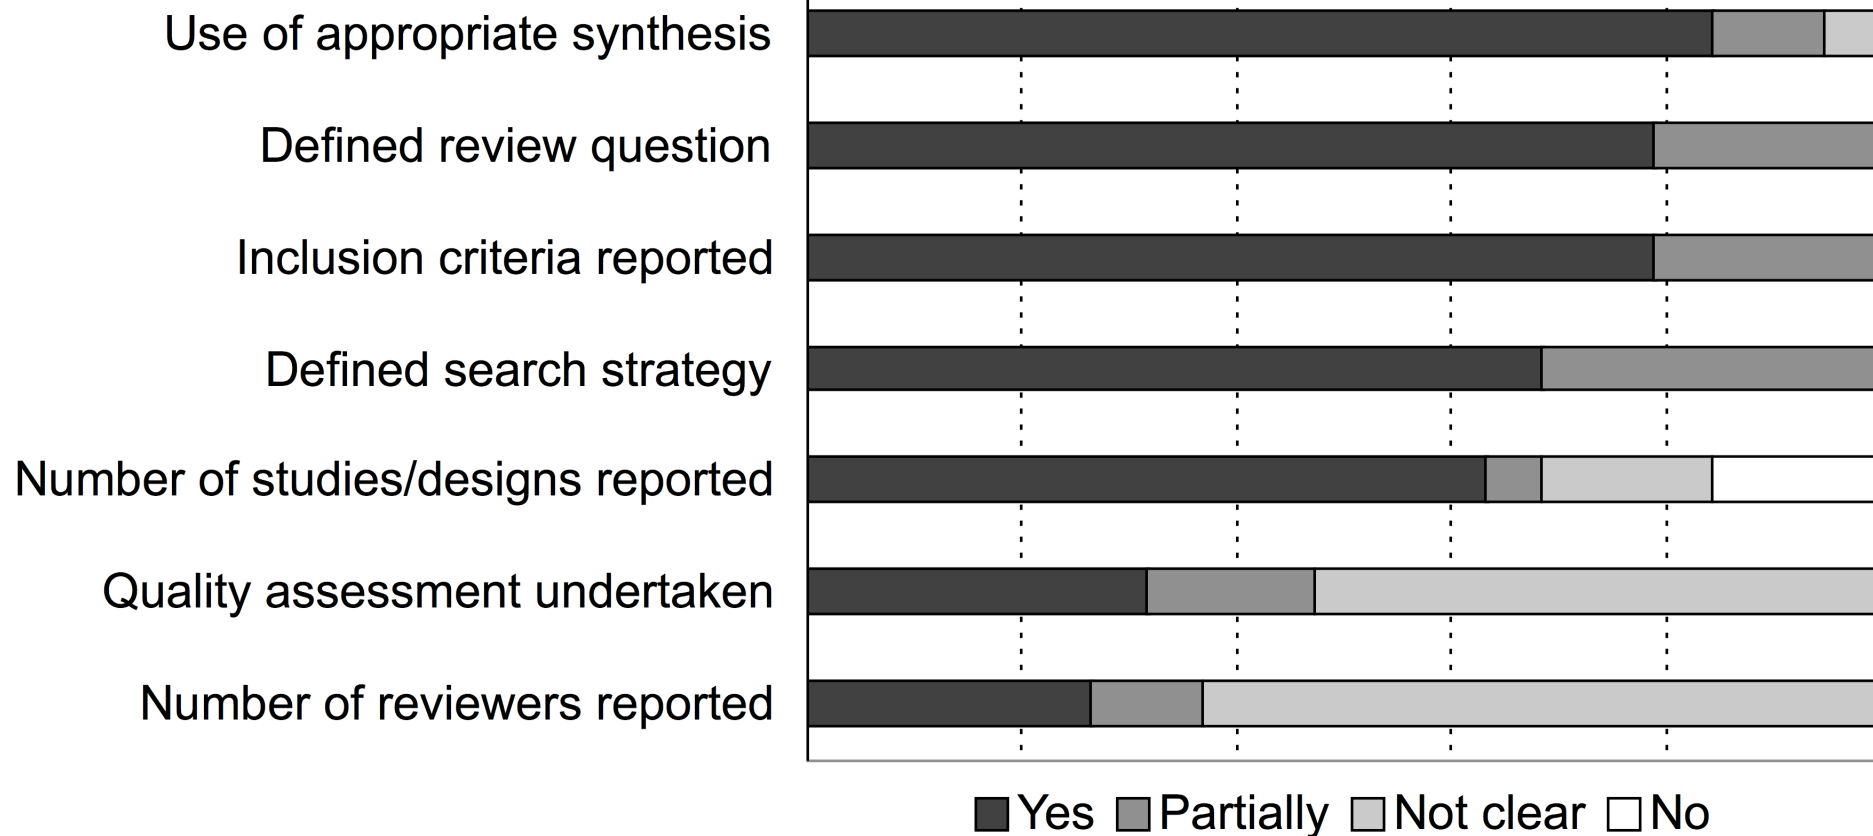

Supplement: MOESM2 [file 9502574]
